# Supplementary material
Source: Elsevier journal article supplement (https://univ-rennes.hal.science/hal-01544465v1/file/mmc2.docx)
Supplement: mmc2 [file mmc2.docx]

**Theoretical studies of mixed-valence organometallic species for potential utilization as quantum cellular automata**

Thomas Groizard, Samia Kahlal, Jean-François Halet*

Institut des Sciences Chimiques de Rennes, UMR 6226 CNRS-Université de Rennes 1, Avenue du Général Leclerc, F-35042 Rennes Cédex, France

**Supplementary Information**

**Figure S1.** Spin orbital diagram of **16-H+**. The Fe(1)/left carbon chain/Fe(2)/right carbon chain/Cp* and dppe percentage contributions are given in brackets. Contour values are ±0.04 (e bohr-3)1/2.

##

**Figure S2.** Spin orbital diagram of **17-H+**. The Fe(1)/left carbon chain/Fe(2)/right carbon chain/Cp* and dppe percentage contributions are given in brackets. Contour values are ±0.04 (e bohr-3)1/2.
